# Supplementary material
Source: publisher figshare collection journal article supplement (https://tandf.figshare.com/ndownloader/files/17939075)
Supplement: Supplementary file 1 [file 17939075]

Suppl. Table 1. Results from a three-way ANOVA comparing mean spat densities among sites, seasons, and years.

| Source | df | MS | *F* | p |
| --- | --- | --- | --- | --- |
| Site | 9 | 0.832 | 52.68 | p < 0.001 |
| Year | 1 | 0.722 | 45.69 | p < 0.001 |
| Season | 3 | 14.14 | 894.64 | p < 0.001 |
| Site x Year | 9 | 0.619 | 39.21 | p < 0.001 |
| Site x Season | 27 | 0.696 | 44.06 | p < 0.001 |
| Year x Season | 3 | 0.553 | 35.01 | p < 0.001 |
| Site x Year x Season | 27 | 0.546 | 34.58 | p < 0.001 |
| Total | 1905 | 0.016 |  |  |
